# Supplementary material
Source: PubMed Central journal article supplement (PMC7644238)

## Supplementary Appendix

### Supplemental table and figures

**Figure 1.** Relation between viral titre (TCID<sub>50</sub>) and time of collection in logarithmic scale. Average viral titers in samples collected at either RT or JT are plotted as function of time-points post-infection.

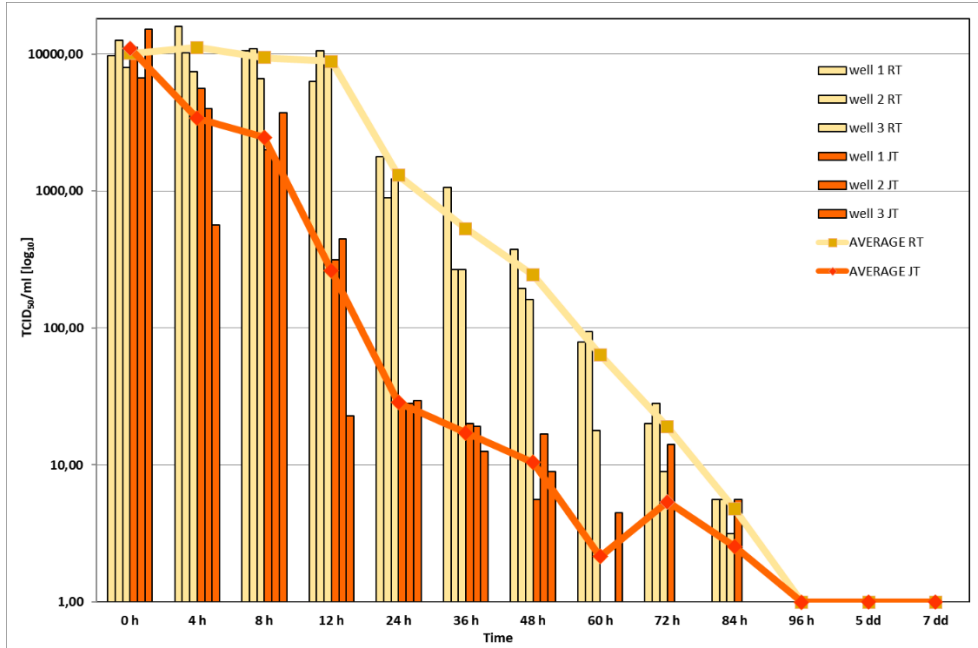

**Table.** Standard deviation (SD) of SARS-CoV-2 titers at different environmental conditions, RT and JT. In this study, 95% of confidence interval (CI) was considered.

| Time | RT   |       |        | JT   |       |        |
|------|------|-------|--------|------|-------|--------|
|      | Mean | SD    | CI     | Mean | SD    | CI     |
| 0 h  | 4,00 | 0,082 | ±0,003 | 4,02 | 0,147 | ±0,006 |
| 4 h  | 4,03 | 0,135 | ±0,006 | 3,37 | 0,440 | ±0,018 |
| 8 h  | 3,96 | 0,100 | ±0,004 | 3,70 | 0,617 | ±0,025 |
| 12 h | 3,94 | 0,097 | ±0,004 | 2,17 | 0,576 | ±0,024 |
| 24 h | 3,10 | 0,123 | ±0,005 | 1,46 | 0,009 | ±0,000 |
| 36 h | 2,63 | 0,283 | ±0,012 | 1,23 | 0,090 | ±0,004 |
| 48 h | 2,36 | 0,157 | ±0,006 | 0,98 | 0,195 | ±0,008 |
| 60 h | 1,71 | 0,326 | ±0,013 | 0,22 | 0,306 | ±0,013 |
| 72 h | 1,23 | 0,209 | ±0,009 | 0,38 | 0,542 | ±0,022 |
| 84 h | 0,67 | 0,118 | ±0,005 | 0,25 | 0,354 | ±0,014 |

**Figure 2.** Relation between viral titres by PFU and TCID<sub>50</sub> and time of collection at RT in logarithmic scale. Average viral titers (TCID<sub>50</sub> and PFU) in samples collected at RT are plotted as function of days post-infection. The decay trend by TCID<sub>50</sub> is confirmed by plaque assay.

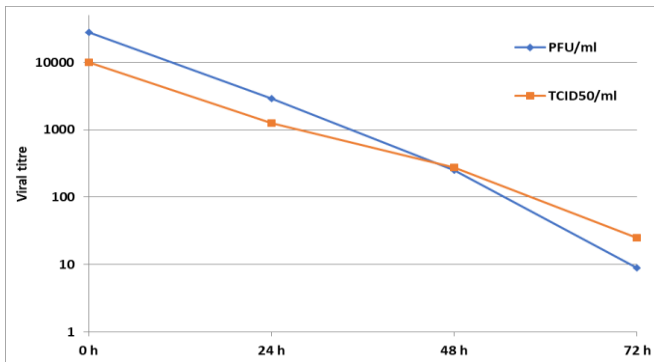

**Figure 3.** SARS-Cov-2 CPE in Vero cells (A) and Mock (B).

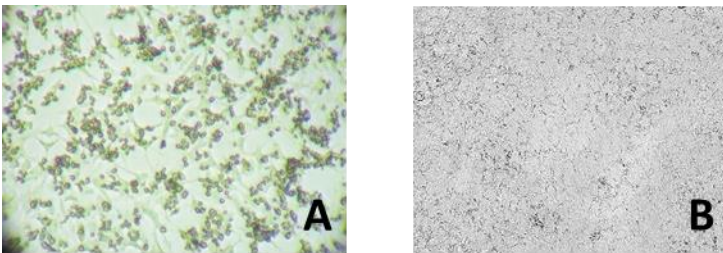

**Figure 4.** Viral plaques of SARS-Cov-2 in Vero E6 cells

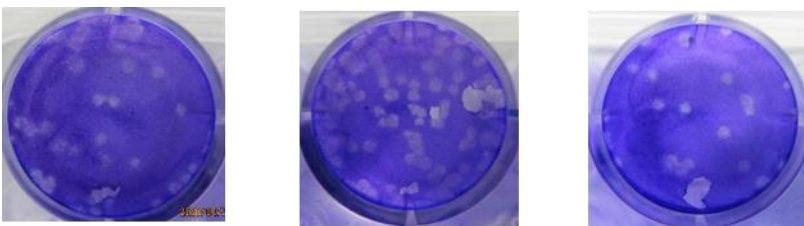

Supplement: mmc1.pdf [file mmc1.pdf]
